# Supplementary material for: The structure–activity relationship of aryloxyacetylthioureas for the inhibition of Orobanche minor radicle elongation
Source: PubMed Central journal article supplement — J Pestic Sci. 2023 Nov 20;48(4):149–55. doi: 10.1584/jpestics.D23-034 (PMC10710931; doi:10.1584/jpestics.d23-034), 2023-11-20
Supplement: jps-48-4-D23-034-s001.pdf [file jps-48-4-D23-034-s001.pdf]

**Table S1.** Relative radicle lengths of *O. minor* treated with aryloxyacetylthioureas at 9 DAT.

| Compound   | Concentration |                  |                   |                  |                   |                  |
|------------|---------------|------------------|-------------------|------------------|-------------------|------------------|
|            | 10 ppm        | (n) <sup>a</sup> | 1 ppm             | (n) <sup>a</sup> | 0.1 ppm           | (n) <sup>a</sup> |
| 1          | 1.14 ± 0.33*  | (45)             | n.d. <sup>b</sup> |                  | n.d. <sup>b</sup> |                  |
| 2          | 0.80 ± 0.23** | (46)             | 0.93 ± 0.30       | (50)             | n.d. <sup>b</sup> |                  |
| 3          | 1.03 ± 0.30   | (49)             | n.d. <sup>b</sup> |                  | n.d. <sup>b</sup> |                  |
| 4          | 1.12 ± 0.30*  | (45)             | n.d. <sup>a</sup> |                  | n.d. <sup>b</sup> |                  |
| 5          | 0.85 ± 0.23** | (52)             | 0.91 ± 0.21*      | (47)             | n.d. <sup>b</sup> |                  |
| 6          | 0.97 ± 0.31   | (55)             | n.d. <sup>b</sup> |                  | n.d. <sup>b</sup> |                  |
| 7          | 0.57 ± 0.15** | (51)             | 0.92 ± 0.25       | (49)             | n.d. <sup>b</sup> |                  |
| 8          | 0.78 ± 0.26** | (43)             | 0.91 ± 0.22       | (41)             | n.d. <sup>b</sup> |                  |
| 9          | 0.12 ± 0.10** | (50)             | 0.47 ± 0.14**     | (62)             | n.d. <sup>b</sup> |                  |
| 10         | 0.14 ± 0.06** | (72)             | 1.04 ± 0.23       | (43)             | n.d. <sup>b</sup> |                  |
| 11         | 0.13 ± 0.04** | (77)             | 0.89 ± 0.19*      | (55)             | n.d. <sup>b</sup> |                  |
| 12         | 0.49 ± 0.23** | (50)             | 1.00 ± 0.22       | (45)             | n.d. <sup>b</sup> |                  |
| 13         | 0.68 ± 0.26** | (52)             | 1.06 ± 0.25       | (45)             | n.d. <sup>b</sup> |                  |
| 14         | 0.81 ± 0.28** | (53)             | 0.98 ± 0.25       | (48)             | n.d. <sup>b</sup> |                  |
| 15         | 0.39 ± 0.15** | (59)             | 0.76 ± 0.26**     | (51)             | n.d. <sup>b</sup> |                  |
| 16 (PI-28) | 0.10 ± 0.02** | (65)             | 0.76 ± 0.21**     | (57)             | n.d. <sup>b</sup> |                  |
| 17         | 0.12 ± 0.05** | (56)             | 0.45 ± 0.16**     | (56)             | n.d. <sup>b</sup> |                  |
| 18         | 0.15 ± 0.09** | (66)             | 0.76 ± 0.25**     | (44)             | n.d. <sup>b</sup> |                  |
| 19         | 0.11 ± 0.08** | (56)             | 0.24 ± 0.16**     | (54)             | 0.87 ± 0.19**     | (41)             |
| 20         | 0.11 ± 0.05** | (76)             | 0.12 ± 0.05**     | (54)             | 0.80 ± 0.20**     | (47)             |
| 21         | 0.25 ± 0.11** | (79)             | 0.74 ± 0.21**     | (61)             | n.d. <sup>b</sup> |                  |

\* $p < 0.05$ , \*\* $p < 0.01$  by Student's *t*-test

<sup>a</sup>Number of radicles measured the lengths. <sup>b</sup>Not determined.



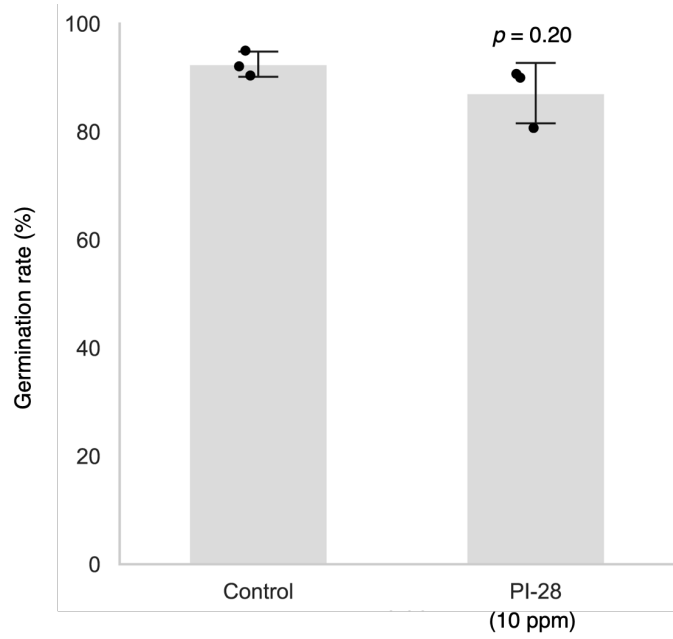

**Fig. S2.** The effect of the PI-28 at 10 ppm on the germination rate of *O. minor* at 9 DAT. The seeds were germinated with 1 ppm *rac*-GR24 with or without (control) PI-28. Significant differences were evaluated via the Student's *t*-test,  $n = 3$ .

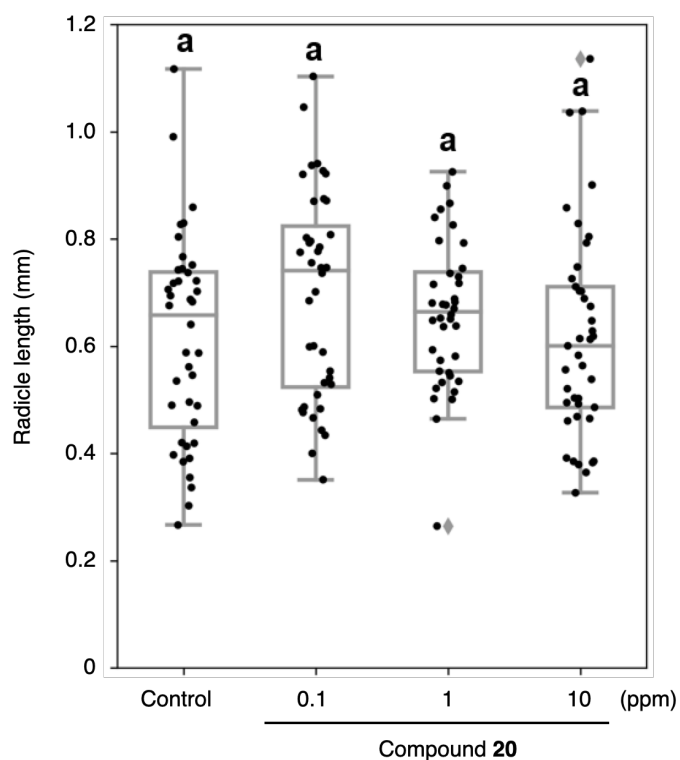

**Fig. S3.** The effect of the aryloxyacetylthiourea **20** at 0.1, 1, and 10 ppm on the radicle elongation of *S. hermonthica* at 1 DAT. The seeds were germinated with 1 ppm *rac*-GR24 with or without (control) the thiourea. The radicle lengths of *S. hermonthica* in each treatment were measured using Image J software and shown as a boxplot. Different letters indicate significant differences ( $p < 0.05$ ) among the treatments evaluated via the Tukey-Kramer test,  $n = 40$ .
